# Supplementary material for: Trends in the Management of Headache Disorders in US Emergency Departments: Analysis of 2007–2018 National Hospital Ambulatory Medical Care Survey Data
Source: MDPI journal article supplement (doi:10.3390/jcm11051401), 2022-03-03
Supplement: s1 [file s1]

## **SUPPLEMENTARY MATERIALS**

**Table S1. ICD-9-CM/ICD-10-CM codes used to identify headache-related ED visits in NHAMCS**

**Table S2. Multum Lexicon Plus® generic codes used to identify medication use among headache-related ED visits in NHAMCS**

**Table S3. ICD-9-CM/ICD-10-CM codes used to identify medical conditions associated with secondary headaches**

**Figure S1. Number and proportion of headache-related ED visits in the US: 2007 to 2018 NHAMCS data (Primary analysis & sensitivity analysis 1)**

**Figure S2. Diphenhydramine co-administration among headache-related ED visits with dopamine receptor antagonist administration: 2007 to 2018 NHAMCS data**

**Figure S3. Trends in medication use, neuroimaging use, and outpatient referral for follow-up among migraine-related ED visits: 2007 to 2018 NHAMCS data (Primary analysis)**

**Figure S4. Trends in medication use, neuroimaging use, and outpatient referral for follow-up among not-otherwise-specified headache-related ED visits: 2007 to 2018 NHAMCS data (Primary analysis)**

**Figure S5. Number and proportion of headache-related ED visits in the US: 2007 to 2018 NHAMCS data (Sensitivity analyses 2 & 3)**

**Figure S6. Number and proportion of headache-related ED visits in the US: 2007 to 2018 NHAMCS data (Sensitivity analysis 4)**

**Figure S7. Trends in medication use, neuroimaging use, and referrals to follow-up among headache-related ED visits: 2007 to 2018 NHAMCS data (Sensitivity analysis 1)**

**Figure S8. Trends in medication use, neuroimaging use, and referrals to follow-up among headache-related ED visits: 2007 to 2018 NHAMCS data (Sensitivity analysis 2)**

**Figure S9. Trends in medication use, neuroimaging use, and referrals to follow-up among headache-related ED visits: 2007 to 2018 NHAMCS data (Sensitivity analysis 3)**

**Figure S10. Trends in medication use, neuroimaging use, and referrals to follow-up among headache-related ED visits: 2007 to 2018 NHAMCS data (Sensitivity analysis 4)**

**Table S1. ICD-9-CM/ICD-10-CM codes used to identify headache-related ED visits in NHAMCS**

| Headache subtypes              | ICD-9-CM Codes | ICD-10-CM Codes |
|--------------------------------|----------------|-----------------|
| Migraine                       | 346.xx         | G43.xxx         |
| Tension-type headache          | 339.1x 307.81  | G44.2xx         |
| Trigeminal autonomic cephalgia | 339.0x         | G44.0xx         |
| NOS headache                   | 784.0          | R51.x           |

Abbreviations: ED: emergency department; NHAMCS: National Hospital Ambulatory Medical Care Survey; ICD-9-CM: International Classification of Diseases, Ninth Revision, Clinical Modification; ICD-10-CM: International Classification of Diseases, Tenth Revision, Clinical Modification; NOS: Not Otherwise Specified

**Table S2. Multum Lexicon Plus® generic codes used to identify medication use among headache-related ED visits in NHAMCS**

| <b>Medication Class and Drugs</b>    | <b>Generic Codes</b>                                               |
|--------------------------------------|--------------------------------------------------------------------|
| <b>Opioids<sup>a</sup></b>           |                                                                    |
| Buprenorphine                        | d00840                                                             |
| Butorphanol                          | d00838                                                             |
| Codeine                              | d00012 d03423 d03425 d03426                                        |
| Fentanyl                             | d00233                                                             |
| Hydrocodone                          | d03075 d03428 <sup>†</sup> d04225 <sup>†</sup>                     |
| Hydromorphone                        | d00255                                                             |
| Meperidine                           | d00017                                                             |
| Morphine                             | d00308                                                             |
| Nalbuphine                           | d00839                                                             |
| Oxycodone                            | d00329 d03431 <sup>†</sup>                                         |
| Propoxyphene                         | d00360 d03434 <sup>†</sup> d03435 <sup>†</sup>                     |
| Tapentadol                           | d07453                                                             |
| Tramadol                             | d03826 d04766                                                      |
| Butalbital                           | d03061 d03455 <sup>†</sup> d03456 <sup>†</sup> d03457 <sup>†</sup> |
| <b>Ergot alkaloids/Triptans</b>      |                                                                    |
| Dihydroergotamine                    | d00211                                                             |
| Ergotamine                           | d00222 d04120                                                      |
| Almotriptan                          | d04757                                                             |
| Eletriptan                           | d04849                                                             |
| Frovatriptan                         | d04776                                                             |
| Rizatriptan                          | d04328                                                             |
| Sumatriptan                          | d03160 d07130 <sup>†</sup>                                         |
| Zolmitriptan                         | d04253                                                             |
| <b>Acetaminophen/NSAIDs</b>          |                                                                    |
| Acetaminophen                        | a11027 d00049 d03297 d03445 <sup>†</sup> d05701 d03439             |
| Aspirin                              | a10464 a11190                                                      |
| Diclofenac                           | d00848                                                             |
| Etodolac                             | d00851                                                             |
| Flurbiprofen                         | d00239                                                             |
| Ibuprofen                            | d00015                                                             |
| Indomethacin                         | d00039                                                             |
| Ketorolac                            | d00273                                                             |
| Mefenamic Acid                       | d00285                                                             |
| Meloxicam                            | d04532                                                             |
| Nabumetone                           | d00310                                                             |
| Naproxen                             | d00019                                                             |
| Phenylbutazone                       | d00341                                                             |
| <b>Antiemetics<sup>b</sup></b>       |                                                                    |
| <b>Dopamine receptor antagonists</b> |                                                                    |
| Chlorpromazine                       | d00064                                                             |
| Prochlorperazine                     | d00355                                                             |
| Droperidol                           | d00219                                                             |
| Haloperidol                          | d00027                                                             |
| Metoclopramide                       | d00298                                                             |
| Domperidone                          | a59812                                                             |
| Promethazine                         | d00787                                                             |

|                            |        |
|----------------------------|--------|
| 5-HT3 receptor antagonists |        |
| Ondansetron                | d00867 |
| Granisetron                | d03171 |
| Dolasetron                 | d04214 |
| Diphenhydramine            | d00212 |
| Corticosteroids            |        |
| Dexamethasone              | d00206 |
| Methylprednisolone         | d00293 |
| Prednisone                 | d00350 |

Abbreviations: ED: Emergency Department; NHAMCS: National Hospital Ambulatory Medical Care Survey; NSAID: Non-Steroidal Anti-Inflammatory Drug

<sup>a</sup> Opioid antitussives classified as '124: antitussives' or '132: upper respiratory combinations' by Multum Lexicon Plus® were excluded.

<sup>b</sup> Antiemetic class includes dopamine receptor antagonists and 5-HT3 antagonists. Although promethazine has both antihistamine and antidopaminergic properties, it is classified as a dopamine receptor antagonist. Because it is commonly used for antiemetic purpose, rather than preventing akathisia such as diphenhydramine.

<sup>†</sup> These medications are combination products. We used the following hierarchy order based on their analgesic potency to classify them: opioids > butalbital > ergot alkaloids/triptans > acetaminophen/NSAIDs > diphenhydramine.

**Table S3. ICD-9-CM/ICD-10-CM codes used to identify medical conditions associated with secondary headaches**

| Conditions                                    | ICD-9-CM Codes                                                        | ICD-10-CM Codes                                                    |
|-----------------------------------------------|-----------------------------------------------------------------------|--------------------------------------------------------------------|
| Acute angle closure glaucoma                  | 365.22                                                                | H40.21                                                             |
| Benign intracranial hypertension              | 348.2                                                                 | G93.2                                                              |
| Brain tumor                                   | 239.6, 237.5                                                          | D43.0 D43.1 D43.2 D49.6                                            |
| Carbon monoxide poisoning                     | 986                                                                   | T58.xx                                                             |
| Carotid artery dissection                     | 443.21                                                                | I77.71                                                             |
| Cerebral aneurysm                             | 437.3                                                                 | I67.1                                                              |
| Cerebral infarction                           | 434.xx                                                                | I63.xx                                                             |
| Cerebral venous thrombosis                    | 437.6                                                                 | I67.6                                                              |
| Chronic sinusitis                             | 473.x                                                                 | J32.x                                                              |
| Complicated headache syndromes                | 339.4x                                                                | G44.5x                                                             |
| Drug-induced headache                         | 339.3                                                                 | G44.4x                                                             |
| Encephalitis                                  | 323.xx 062.x 063.x 064                                                | G04.xx G05.xx A83.x A84.xx A85.x A86                               |
| Giant cell arteritis                          | 446.5                                                                 | M31.6                                                              |
| Hypertension encephalopathy                   | 437.2                                                                 | I67.4                                                              |
| Intracerebral hemorrhage                      | 431.xx                                                                | I61.xx                                                             |
| Intracranial hemorrhage                       | 432.xx                                                                | I62.xx                                                             |
| Intracranial space-occupying lesions          | 784.2                                                                 | R90.0                                                              |
| Malignant neoplasm of brain                   | 191.x                                                                 | C71.x                                                              |
| Meningitis                                    | 320.xx 321.xx 322.xx                                                  | G00.xx G01.xx G02.xx G03.xx A87.x                                  |
| Occipital neuralgia                           | 723.8                                                                 | M54.81                                                             |
| Other specified headache syndromes            | 339.8x                                                                | G44.8x                                                             |
| Post-traumatic headache                       | 339.2x                                                                | G44.3x                                                             |
| Preeclampsia                                  | 642.4x 642.5x 642.6x 642.7x                                           | O11.x O14.xx                                                       |
| Reversible cerebral vasoconstriction syndrome | 435.9                                                                 | I67.841                                                            |
| Subarachnoid hemorrhage                       | 430.xx                                                                | I60.xx                                                             |
| Subdural hematoma                             | 432.1                                                                 | I62.x                                                              |
| Tolosa-hunt syndrome                          | 378.55                                                                | H49.4x                                                             |
| Traumatic brain injury                        | 800.xx 801.xx 802.xx 803.xx 804.xx 850.xx 851.xx 852.xx 853.xx 854.xx | S00.xx S01.xx S02.x S03.xx S04.xx S05.xx S06.x S07.x S08.xx S09.xx |
| Vertebral artery dissection                   | 443.24                                                                | I77.74                                                             |

Abbreviations: ICD-9-CM: International Classification of Diseases, Ninth Revision, Clinical Modification; ICD-10-CM: International Classification of Diseases, Tenth Revision, Clinical Modification

**Figure S1. Number and proportion of headache-related ED visits in the US: 2007 to 2018 NHAMCS data (Primary analysis & sensitivity analysis 1)**

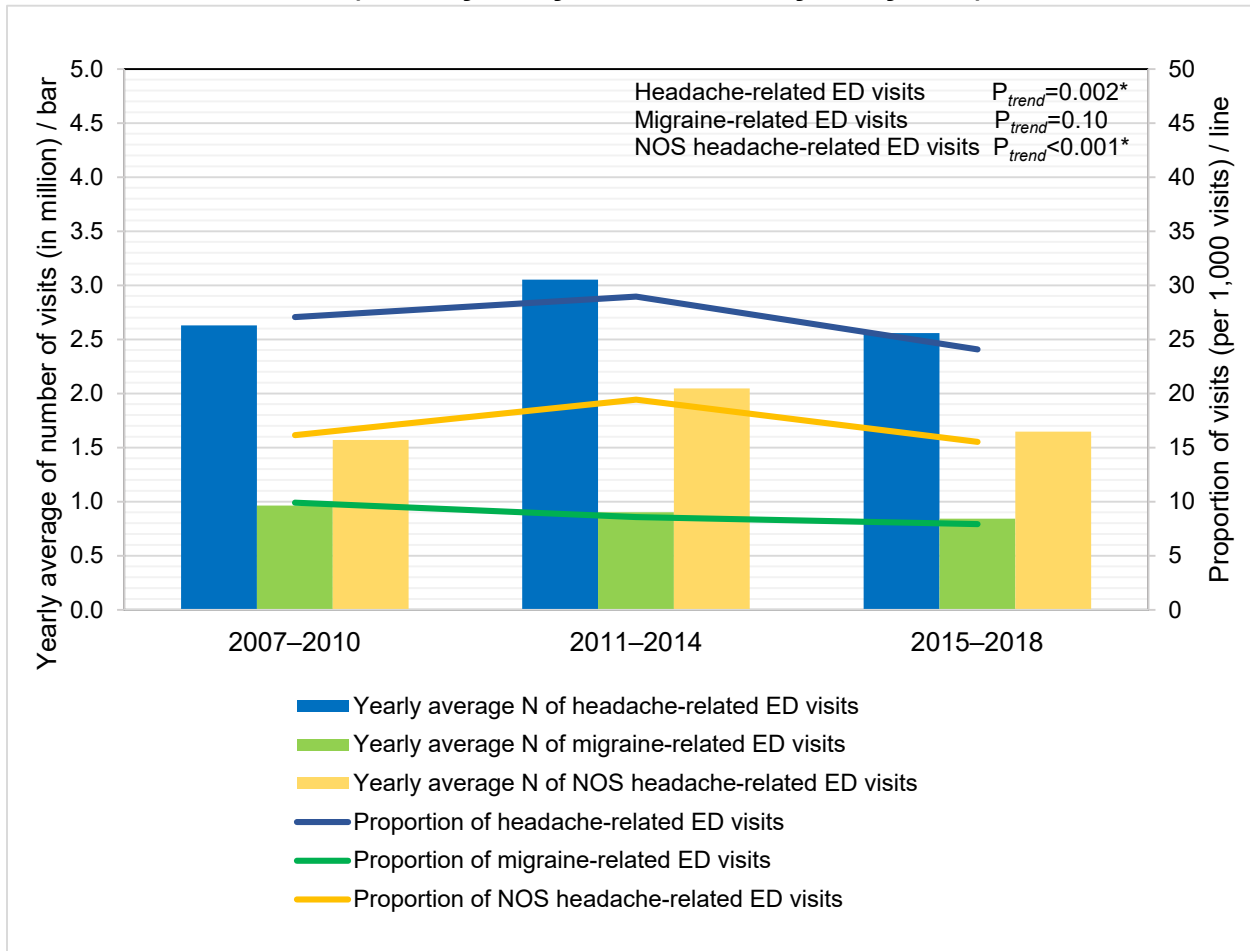

Abbreviations: ED: Emergency Department; US: United States; NHAMCS: National Hospital Ambulatory Medical Care Survey; NOS: Not Otherwise Specified

\* A statistically significant trend with  $P_{trend}<0.001$ . All  $P_{trend}$  were adjusted for age, sex, race, payment source, and practice region.

**Figure S2. Diphenhydramine co-administration among headache-related ED visits with dopamine receptor antagonist administration: 2007 to 2018 NHAMCS data**

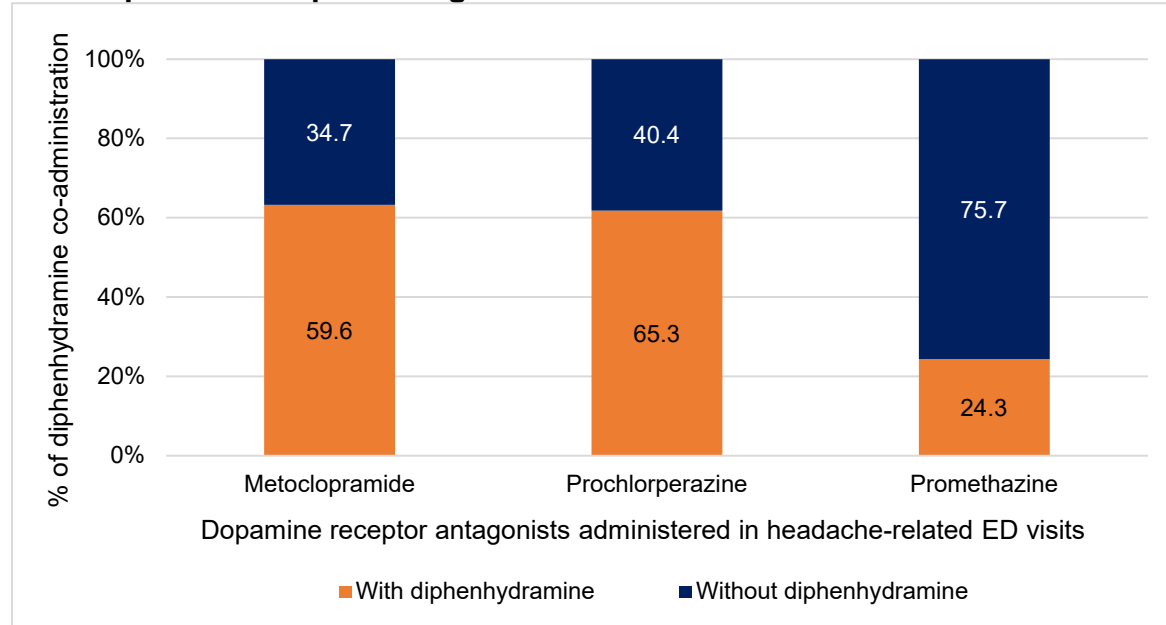

**Figure S3. Trends in medication use, neuroimaging use, and outpatient referral for follow-up among migraine-related ED visits: 2007 to 2018 NHAMCS data (Primary analysis)**

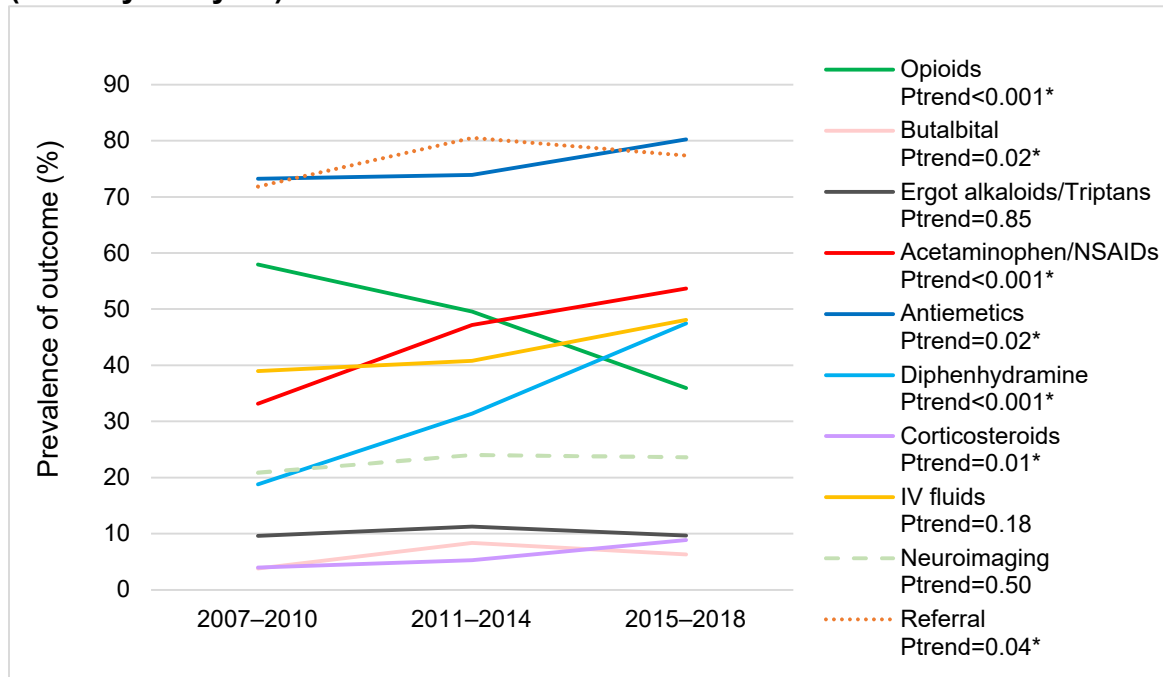

Abbreviations: ED: Emergency Department; NHAMCS: National Hospital Ambulatory Medical Care Survey; NSAID: Non-Steroidal Anti-Inflammatory Drug

\* A statistically significant trend with  $P_{trend} < 0.001$ . All  $P_{trend}$  were adjusted for age, sex, race, payment source, and practice region.



**Figure S4. Trends in medication use, neuroimaging use, and outpatient referral for follow-up among not-otherwise-specified headache-related ED visits: 2007 to 2018 NHAMCS data (Primary analysis)**

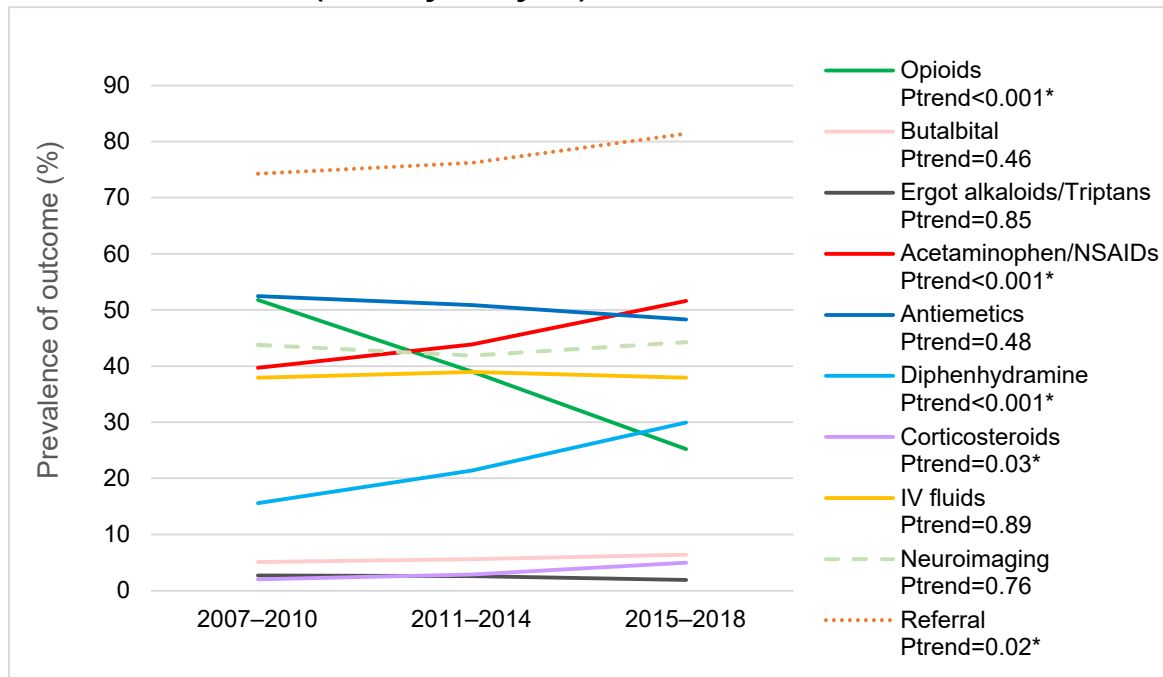

Abbreviations: ED: Emergency Department; NHAMCS: National Hospital Ambulatory Medical Care Survey; NSAID: Non-Steroidal Anti-Inflammatory Drug

\* A statistically significant trend with  $P_{trend} < 0.001$ . All  $P_{trend}$  were adjusted for age, sex, race, payment source, and practice region.

**Figure S5. Number and proportion of headache-related ED visits in the US: 2007 to 2018 NHAMCS data (Sensitivity analyses 2 & 3)**

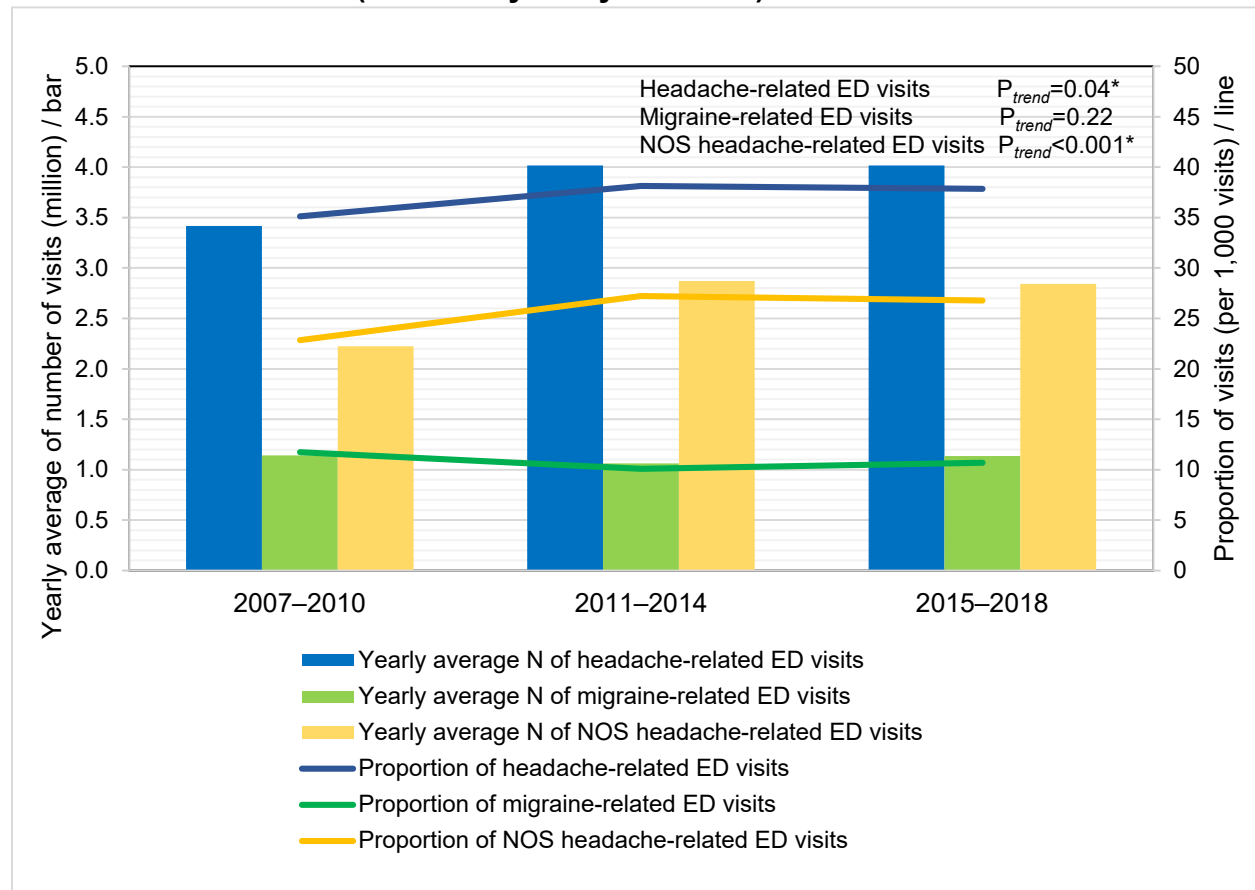

Abbreviations: ED: Emergency Department; US: United States; NHAMCS: National Hospital Ambulatory Medical Care Survey; NOS: Not Otherwise Specified

\* A statistically significant trend with  $P_{trend}<0.001$ . All  $P_{trend}$  were adjusted for age, sex, race, payment source, and practice region.

**Figure S6. Number and proportion of headache-related ED visits in the US: 2007 to 2018 NHAMCS data (Sensitivity analysis 4)**

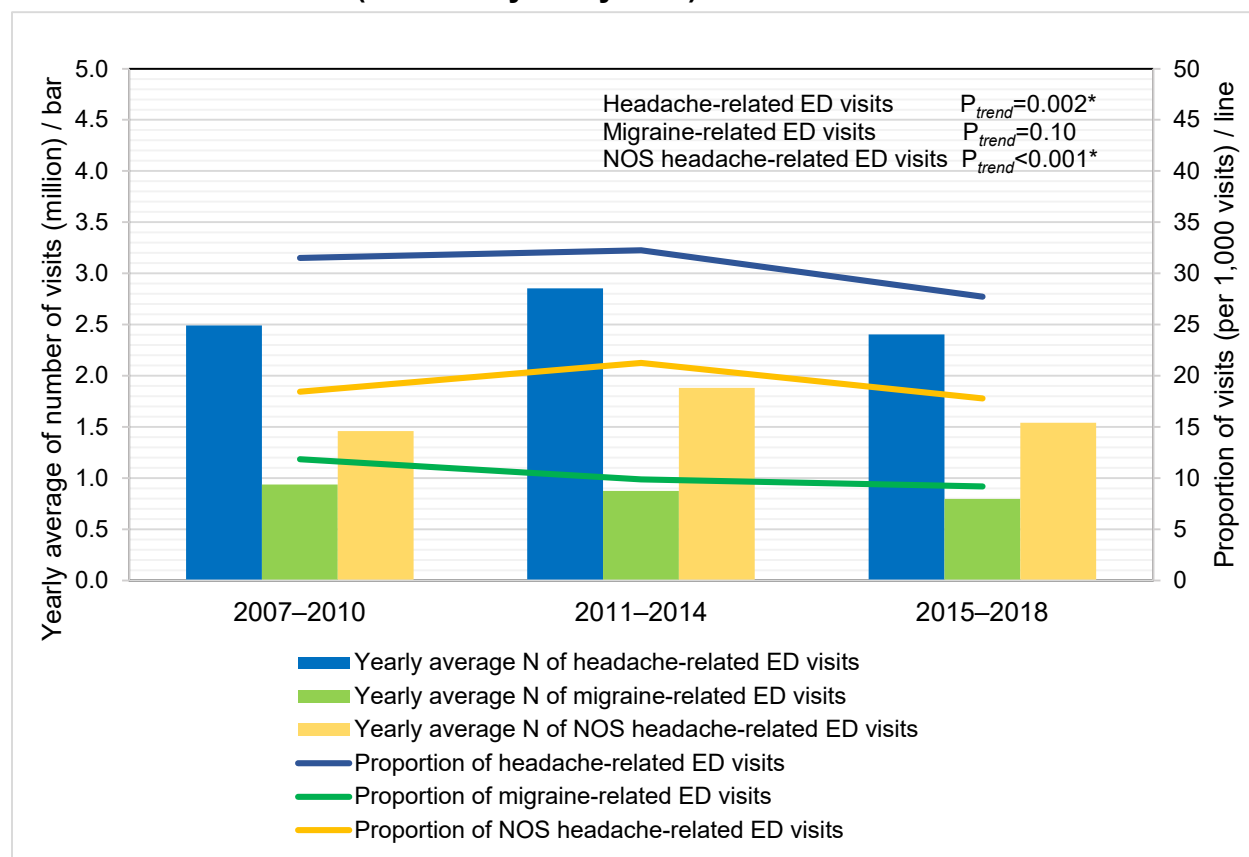

Abbreviations: ED: Emergency Department; US: United States; NHAMCS: National Hospital Ambulatory Medical Care Survey; NOS: Not Otherwise Specified

\* A statistically significant trend with  $P_{trend}<0.001$ . All  $P_{trend}$  were adjusted for age, sex, race, payment source, and practice region.

**Figure S7. Trends in medication use, neuroimaging use, and referrals to follow-up among headache-related ED visits: 2007 to 2018 NHAMCS data (Sensitivity analysis 1)**

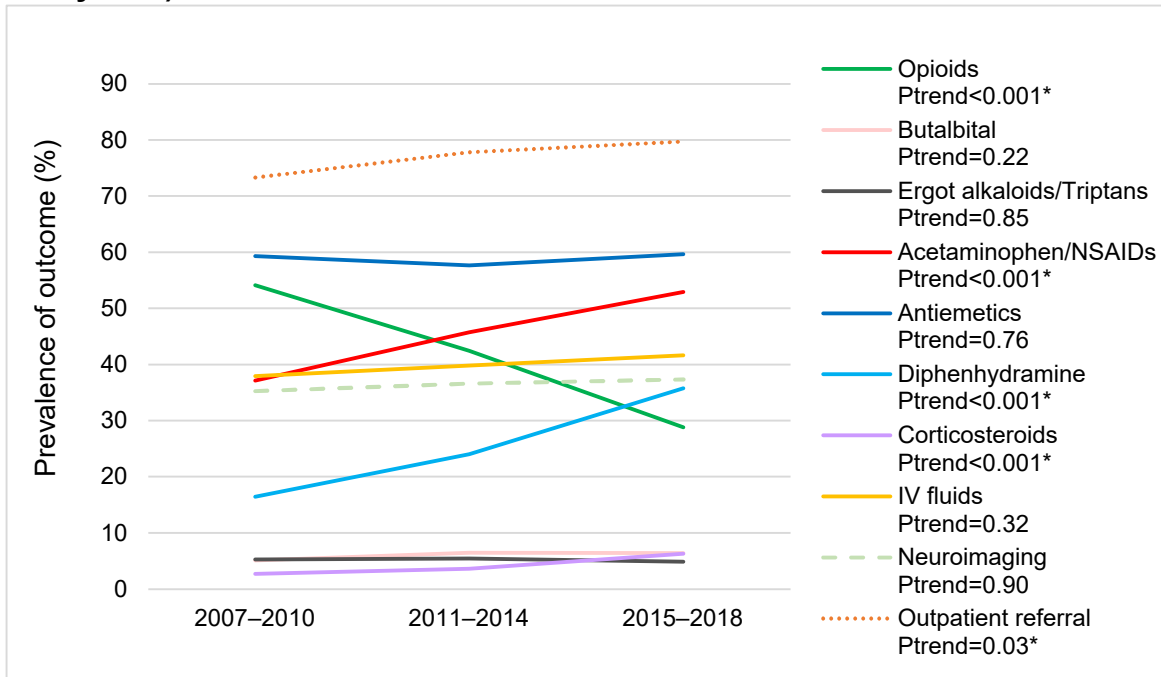

Abbreviations: ED: Emergency Department; NHAMCS: National Hospital Ambulatory Medical Care Survey; NSAID: Non-Steroidal Anti-Inflammatory Drug

\* A statistically significant trend with  $P_{trend} < 0.001$ . All  $P_{trend}$  were adjusted for age, sex, race, payment source, and practice region.

**Figure S8. Trends in medication use, neuroimaging use, and referrals to follow-up among headache-related ED visits: 2007 to 2018 NHAMCS data (Sensitivity analysis 2)**

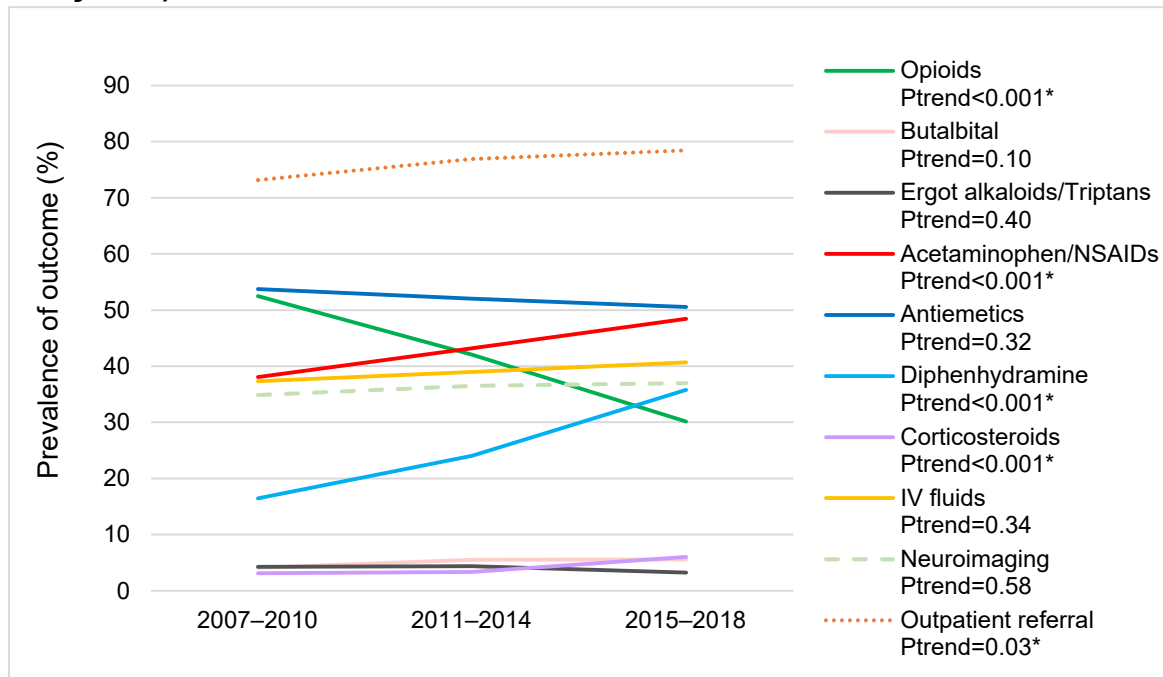

Abbreviations: ED: Emergency Department; NHAMCS: National Hospital Ambulatory Medical Care Survey; NSAID: Non-Steroidal Anti-Inflammatory Drug

\* A statistically significant trend with  $P_{trend} < 0.001$ . All  $P_{trend}$  were adjusted for age, sex, race, payment source, and practice region.

**Figure S9. Trends in medication use, neuroimaging use, and referrals to follow-up among headache-related ED visits: 2007 to 2018 NHAMCS data (Sensitivity analysis 3)**

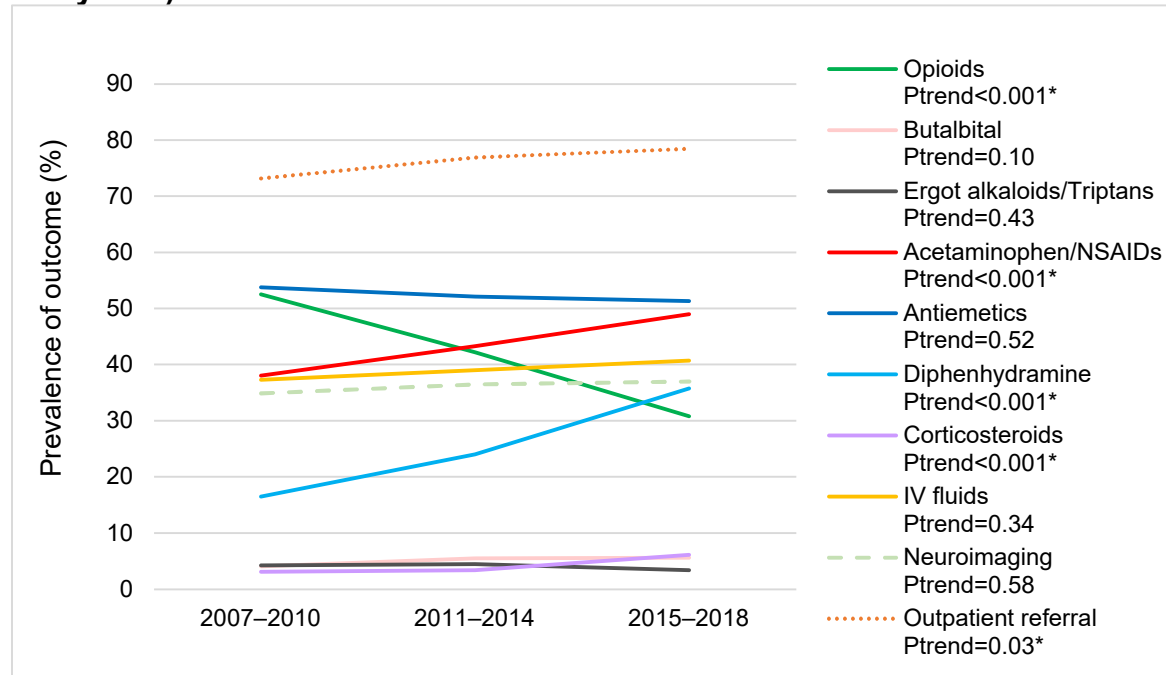

Abbreviations: ED: Emergency Department; NHAMCS: National Hospital Ambulatory Medical Care Survey; NSAID: Non-Steroidal Anti-Inflammatory Drug

\* A statistically significant trend with  $P_{trend} < 0.001$ . All  $P_{trend}$  were adjusted for age, sex, race, payment source, and practice region.

**Figure S10. Trends in medication use, neuroimaging use, and referrals to follow-up among headache-related ED visits: 2007 to 2018 NHAMCS data (Sensitivity analysis 4)**

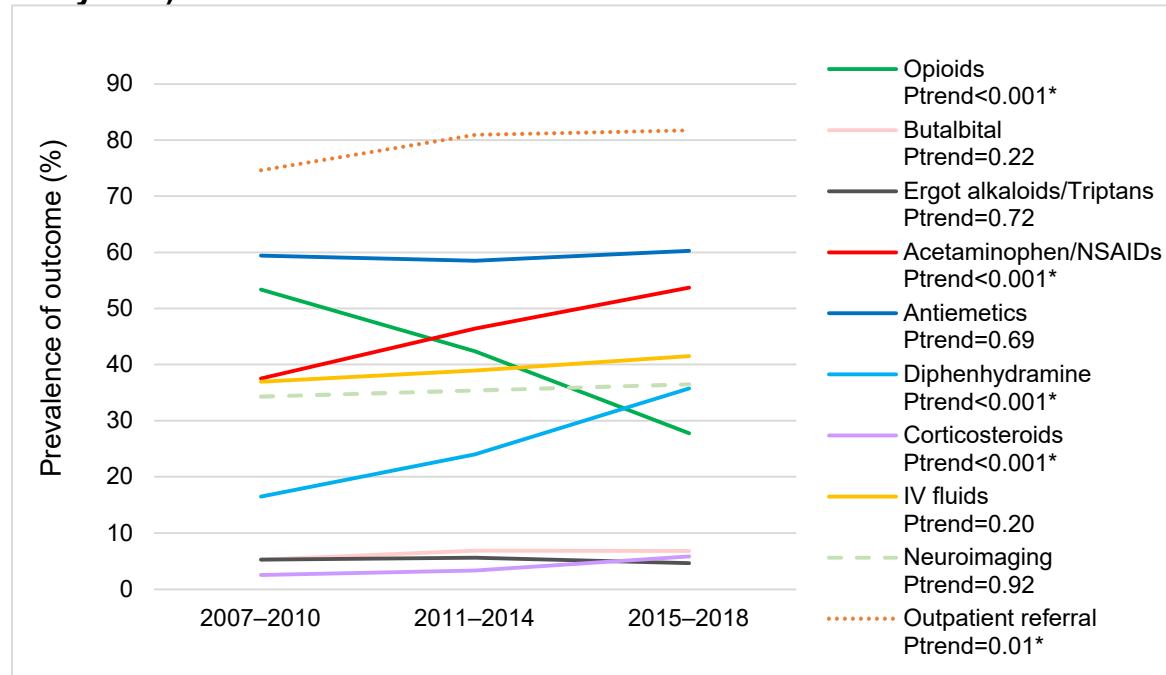

Abbreviations: ED: Emergency Department; NHAMCS: National Hospital Ambulatory Medical Care Survey; NSAID: Non-Steroidal Anti-Inflammatory Drug

\* A statistically significant trend with  $P_{trend} < 0.001$ . All  $P_{trend}$  were adjusted for age, sex, race, payment source, and practice region.
